# Supplementary material
Source: publisher figshare collection journal article supplement (https://asha.figshare.com/ndownloader/files/32408189)
Supplement: Supplementary file 1 [file 32408189]

## Sheet: Explanation
Supplemental material, Sand et al., “On the Benefits of Speech-Language Therapy for Individuals Born With Cleft Palate: A Systematic Review and Meta-Analysis of Individual Participant Data,” JSLHR, https://doi.org/10.1044/2021_JSLHR-21-00367
Supplemental Material S5. IPD tabulated from the included studies and all our clinical evaluations.
	Here we have tabulated individual data extracted from the various studies and included our judgmeents of benefit and "good" post-therapy outcome.
	The different sheets relate to the outcome categories (Speech; Language; Intelligibility; Participation).
	Please note that data from Sweeney et al. 2020 was included in the analyses of Speech, Intelligiblity, and PRO. The individual participant data was generously shared to us by the authors, but we do not have permission to include it in this open access upload.
	Column	Explanation
	Study	Id of study.
	TherapyType	Type of therapy: Motor-phonetic vs Language/Phonological.
	Delivery	Delivery: By SLP, parent, or speech assistant at clinic, camp, or at home.
	Duration	Dosage of therapy in weeks.
	Patient	Patient ID in study.
	Exclusion	If excluded, (by us) for what reason?
	Year	Age in years.
	Y:Month	Age in months. (Note that age is tabulated as (e.g.) 4.5 years (only in "Year" column) or 4 years and 6 months (on Year and Y:Month column.)
	Months	Age in months.
	Gender	M = Male; F = Female.
	Cleft	CP = Cleft palate; CL = Cleft lip; UCLP = Unilateralt CLP; BCLP = Bilateral CLP; SMCP = Submucous CP; SPC = Soft palate cleft; VPD = Velopharyngeal dysfunction.
	Pre	Measure at pre (different measure per study).
	Post	Measure at post (different measure per study).
	Difference	Difference between pre and post such that positive values indicate positive change (sometimes post-pre, sometimes pre-post).
	RelevantC	Did we judge the difference/change as clinically relevant or not.
	EndPoint	Did we judge the post/end point measure as being "Good" or Not. EGood is label for Language and Intelligibillity when the child was good ("normal") already at pre (these children were excluded from these analyses).
	Source	Where did we get the data from in the report.
	Note
		Also note that values in gray have been calculated by us.

## Sheet: Speech
Study	TherapyType	Delivery	Duration	Patient	Exclusion	Year	Y:Month	Months	Gender	Cleft	Pre	Post	Difference	RelevantC	EndPoint	Source	Note
Alighieri et al., 2019	Motor-phonetic	SLP (clinic)	0.428571	3		11.4		136.8	M	UCLP	32	38	6	No	No	Table 4 - Data point 2 - 3: pre to post treatment
Alighieri et al., 2019	Motor-phonetic	SLP (clinic)	0.428571	4		11.7		140.4	M	CP	44	48	4	No	No	Table 4
Alighieri et al., 2019	Motor-phonetic	SLP (clinic)	0.428571	5	Too old	39.1		469.2	M	UCLP	65	84	19	Excl	Excl	Table 4
Derakhshandeh et al., 2016	Motor-phonetic	SLP (clinic)	10	P1		5		60	M	SMCP	63.7793	98.4781	34.6988	Yes	Good	Fig. 6; t4 & t10	https://automeris.io/WebPlotDigitizer/userManual.pdf
Derakhshandeh et al., 2016	Motor-phonetic	SLP (clinic)	10	P2		4.5		54	M	UCLP	28.1167	48.3576	20.241	Yes	Not	Fig. 6; t4 & t11	Good according to reference value in SVANTE or for younger - clinical estimation
Derakhshandeh et al., 2016	Motor-phonetic	SLP (clinic)	10	P3		7		84	F	SPC	27.1528	83.0564	55.9036	Yes	Not	Fig. 6; t4 & t12	Good at t12 (one month follow-up)
Derakhshandeh et al., 2016	Motor-phonetic	SLP (clinic)	10	P4		8.5		102	M	UCLP	49.3215	77.2733	27.9518	Yes	Not	Fig. 6; t4 & t13	Good at t12 (one month follow-up)
Derakhshandeh et al., 2016	Motor-phonetic	SLP (clinic)	10	P5		9		108	F	CP	41.6107	77.2733	35.6627	Yes	Not	Fig. 6; t4 & t14	Good at t12 (one month follow-up)
Dobbelsteyn et al., 2014	Motor-phonetic	Parent (home)	16	DT1	Noncleft VPD	11	5	137	M	VPD	78.5			Excl	Excl	Table 4
Dobbelsteyn et al., 2014	Motor-phonetic	Parent (home)	16	DT2		5	11	71	F	UCLP	58.2	62	3.8	No	No	Table 4 + Table 5
Dobbelsteyn et al., 2014	Motor-phonetic	Parent (home)	16	DT3		4	10	58	F	UCLP	40.5	50.1	9.6	Yes	Not	Table 4 + Table 5	Subm CP
Dobbelsteyn et al., 2014	Motor-phonetic	Parent (home)	16	DT4	22Q11.2 deletion	15	7	187	F	VPD	87.3	82.3	-5	Excl	Excl	Table 4 + Table 5
Dobbelsteyn et al., 2014	Motor-phonetic	Parent (home)	16	IT1		16		192	F	CP	71.4	71.4	0	No	No	Table 4	Robin sequence
Dobbelsteyn et al., 2014	Motor-phonetic	Parent (home)	16	IT2	Noncleft VPD	9	9	117	M	VPD	89.3	87.5	-1.8	Excl	Excl	Table 4	Good according to reference value in SVANTE or for younger - clinical estimation
Dobbelsteyn et al., 2014	Motor-phonetic	Parent (home)	16	IT3		6	6	78	F	BCLP	73.7	64.3	-9.4	No	No	Table 4
Dobbelsteyn et al., 2014	Motor-phonetic	Parent (home)	16	IT4		4	3	51	F	UCLP	50	69.6	19.6	Yes	Not	Table 4
Dobbelsteyn et al., 2014	Motor-phonetic	Parent (home)	16	IT5	CHARGE	6	5	77	F	UCLP	55.7	46.8	-8.9	Excl	Excl	Table 4
Dobbelsteyn et al., 2014	Motor-phonetic	Parent (home)	16	IT6		6	5	77	F	UCLP	39.2	40.5	1.3	No	No	Table 4
Dobbelsteyn et al., 2014	Motor-phonetic	Parent (home)	16	IT7		5	0	60	F	UCLP	32.9	35.4	2.5	No	No	Table 4
Dobbelsteyn et al., 2014	Motor-phonetic	Parent (home)	16	IT8	22Q11.2 deletion	4	9	57	F	SMCP	43	44.3	1.3	Excl	Excl	Table 4
Dobbelsteyn et al., 2014	Motor-phonetic	Parent (home)	16	IT9	22Q11.2 deletion	4	10	58	F	SMCP	33.8	44.3	10.5	Excl	Excl	Table 4
Hanchanlert et al., 2015	Motor-phonetic	Speech assistant & parent (home)	36	1		7	1	85	M	BCLP	12	4	8	Yes	Not	Table 2	Good if only one deviation
Hanchanlert et al., 2015	Motor-phonetic	Speech assistant & parent (home)	36	2		8	0	96	M	CP	6	0	6	Yes	Good	Table 2
Hanchanlert et al., 2015	Motor-phonetic	Speech assistant & parent (home)	36	3		3	11	47	M	BCLP	11	1	10	Yes	Good	Table 2
Hanchanlert et al., 2015	Motor-phonetic	Speech assistant & parent (home)	36	4	Second year for child 1	8	1	97	M	BCLP	5	3	2	Excl	Excl	Table 2	Personal communication about patient returning to treatment.
Hanchanlert et al., 2015	Motor-phonetic	Speech assistant & parent (home)	36	5	Second year for child 2	8	11	107	M	CP	1	0	1	Excl	Excl	Table 2	Personal communication about patient returning to treatment.
Hanchanlert et al., 2015	Motor-phonetic	Speech assistant & parent (home)	36	6		4	3	51	M	BCLP	16	9	7	Yes	Not	Table 2
Hanchanlert et al., 2015	Motor-phonetic	Speech assistant & parent (home)	36	7		4	4	52	M	UCLP	10	1	9	Yes	Good	Table 2
Hanchanlert et al., 2015	Motor-phonetic	Speech assistant & parent (home)	36	8		10	4	124	F	UCLP	3	0	3	Yes	Good	Table 2
Hanchanlert et al., 2015	Motor-phonetic	Speech assistant & parent (home)	36	9	Second year for child 6	7	7	91	M	BCLP	10	1	9	Excl	Excl	Table 2	Personal communication about patient returning to treatment.
Hanchanlert et al., 2015	Motor-phonetic	Speech assistant & parent (home)	36	10	Third year for child 6	5	2	62	M	BCLP	11	7	4	Excl	Excl	Table 2	Personal communication about patient returning to treatment.
Hanchanlert et al., 2015	Motor-phonetic	Speech assistant & parent (home)	36	11	Second year for child 7	5	4	64	M	UCLP	1	1	0	Excl	Excl	Table 2	Personal communication about patient returning to treatment.
Lindeborg et al., 2020	Motor-phonetic	SLP & Speech assistant (camp)	1	1		8		96			9	13	-4	No	No	Personal communication	In Pre and Post is the sum of Misarticulations and Glotal stops.
Lindeborg et al., 2020	Motor-phonetic	SLP & Speech assistant (camp)	1	2		17		204			21	10	11	Yes	Not	Personal communication
Lindeborg et al., 2020	Motor-phonetic	SLP & Speech assistant (camp)	1	3		9		108			9	7	2	No	No	Personal communication
Lindeborg et al., 2020	Motor-phonetic	SLP & Speech assistant (camp)	1	4		4		48			16	5	11	Yes	Good	Personal communication
Lindeborg et al., 2020	Motor-phonetic	SLP & Speech assistant (camp)	1	5		4		48			28	35	-7	No	No	Personal communication
Lindeborg et al., 2020	Motor-phonetic	SLP & Speech assistant (camp)	1	6		5		60			0	0	0	No	No	Personal communication	(VPI?)
Lindeborg et al., 2020	Motor-phonetic	SLP & Speech assistant (camp)	1	7		5		60			21	15	6	Yes	Not	Personal communication
Lindeborg et al., 2020	Motor-phonetic	SLP & Speech assistant (camp)	1	8		3		36			45	44	1	No	No	Personal communication
Lindeborg et al., 2020	Motor-phonetic	SLP & Speech assistant (camp)	1	9		11		132			25	23	2	No	No	Personal communication
Lindeborg et al., 2020	Motor-phonetic	SLP & Speech assistant (camp)	1	10		5		60			5	7	-2	No	No	Personal communication
Lindeborg et al., 2020	Motor-phonetic	SLP & Speech assistant (camp)	1	11		3		36			43	27	16	Yes	Not	Personal communication
Lindeborg et al., 2020	Motor-phonetic	SLP & Speech assistant (camp)	1	12		18		216			26	22	4	No	Not	Personal communication
Lindeborg et al., 2020	Motor-phonetic	SLP & Speech assistant (camp)	1	13		6		72			22	19	3	No	No	Personal communication
Lindeborg et al., 2020	Motor-phonetic	SLP & Speech assistant (camp)	1	14		8		96			19	18	1	No	No	Personal communication
Lindeborg et al., 2020	Motor-phonetic	SLP & Speech assistant (camp)	1	15		4		48			24	22	2	No	No	Personal communication
Lindeborg et al., 2020	Motor-phonetic	SLP & Speech assistant (camp)	1	16		3		36			16	14	2	No	No	Personal communication
Lindeborg et al., 2020	Motor-phonetic	SLP & Speech assistant (camp)	1	17		5		60			18	23	-5	No	No	Personal communication
Lindeborg et al., 2020	Motor-phonetic	SLP & Speech assistant (camp)	1	18		10		120			16	11	5	Yes	Not	Personal communication
Lindeborg et al., 2020	Motor-phonetic	SLP & Speech assistant (camp)	1	19		9		108			11	4	7	Yes	Good	Personal communication
Lindeborg et al., 2020	Motor-phonetic	SLP & Speech assistant (camp)	1	20		5		60			13	13	0	No	No	Personal communication
Lindeborg et al., 2020	Motor-phonetic	SLP & Speech assistant (camp)	1	21		18		216			8	9	-1	No	No	Personal communication
Lindeborg et al., 2020	Motor-phonetic	SLP & Speech assistant (camp)	1	22		17		204			6	5	1	No	No	Personal communication
Lindeborg et al., 2020	Motor-phonetic	SLP & Speech assistant (camp)	1	23		11		132			4	1	3	Yes	Good	Personal communication
Lindeborg et al., 2020	Motor-phonetic	SLP & Speech assistant (camp)	1	24		9		108			6	5	1	No	No	Personal communication	(VPI?)
Lindeborg et al., 2020	Motor-phonetic	SLP & Speech assistant (camp)	1	25		8		96			13	11	2	No	No	Personal communication
Lindeborg et al., 2020	Motor-phonetic	SLP & Speech assistant (camp)	1	26		8		96			15	15	0	No	No	Personal communication
Lindeborg et al., 2020	Motor-phonetic	SLP & Speech assistant (camp)	1	27		5		60			12	6	6	Yes	Not	Personal communication
Lindeborg et al., 2020	Motor-phonetic	SLP & Speech assistant (camp)	1	28		4		48			16	11	5	Yes	Not	Personal communication
Lindeborg et al., 2020	Motor-phonetic	SLP & Speech assistant (camp)	1	29		4		48			7	7	0	No	No	Personal communication	(VPI?)
Lindeborg et al., 2020	Motor-phonetic	SLP & Speech assistant (camp)	1	30		16		192			14	12	2	No	No	Personal communication
Lindeborg et al., 2020	Motor-phonetic	SLP & Speech assistant (camp)	1	31		8		96			9	12	-3	No	No	Personal communication
Lindeborg et al., 2020	Motor-phonetic	SLP & Speech assistant (camp)	1	32		3		36			33	27	6	Yes	Not	Personal communication
Lindeborg et al., 2020	Motor-phonetic	SLP & Speech assistant (camp)	1	33	No speech deviations at start	8		96			5	2	3	Excl	Excl	Personal communication	No speech deviations at start
Lindeborg et al., 2020	Motor-phonetic	SLP & Speech assistant (camp)	1	34		13		156			6	10	-4	No	No	Personal communication
Lindeborg et al., 2020	Motor-phonetic	SLP & Speech assistant (camp)	1	35		3.5		42			31	39	-8	No	No	Personal communication
Lindeborg et al., 2020	Motor-phonetic	SLP & Speech assistant (camp)	1	36		3.5		42			2	2	0	No	No	Personal communication	(VPI?)
Lindeborg et al., 2020	Motor-phonetic	SLP & Speech assistant (camp)	1	37		4		48			32	28	4	No	No	Personal communication
Lindeborg et al., 2020	Motor-phonetic	SLP & Speech assistant (camp)	1	38		12		144			15	13	2	No	No	Personal communication
Lindeborg et al., 2020	Motor-phonetic	SLP & Speech assistant (camp)	1	39		3.5		42			17	10	7	Yes	Not	Personal communication
Luyten et al., 2016	Motor-phonetic	SLP (clinic)	0.428571	1		10.7		128.4	F	UCLP	48	68	20	Yes	Not	Table 3
Luyten et al., 2016	Motor-phonetic	SLP (clinic)	0.428571	2		17.6		211.2	F	CP	39	40	1	No	No	Table 3
Luyten et al., 2016	Motor-phonetic	SLP (clinic)	0.428571	3		15.2		182.4	M	CP	38	49	11	No	No	Table 3
Luyten et al., 2016	Motor-phonetic	SLP (clinic)	0.428571	4		19.6		235.2	F	UCLP	26	33	7	No	No	Table 3
Luyten et al., 2016	Motor-phonetic	SLP (clinic)	0.428571	5		7.3		87.6	F	UCLP	59	73	14	Yes	Not	Table 3
Makarabhirom et al., 2015	Motor-phonetic	Speech assistant & parent (home)	36	C001	Only [l/r] substitutions	14	0	168	F	CP	1	0	1	Excl	Excl	Table 3	Good if only l/r deviation
Makarabhirom et al., 2015	Motor-phonetic	Speech assistant & parent (home)	36	C002		7	4	88	F	UCLP	5	1	4	Yes	Good	Table 3	inconsistent
Makarabhirom et al., 2015	Motor-phonetic	Speech assistant & parent (home)	36	C003		10	11	131	M	BCLP	6	1	5	Yes	Not	Table 3
Makarabhirom et al., 2015	Motor-phonetic	Speech assistant & parent (home)	36	C004		7	11	95	M	UCLP	2	1	1	No	No	Table 3
Makarabhirom et al., 2015	Motor-phonetic	Speech assistant & parent (home)	36	C005		8	5	101	M	UCLP	2	0	2	Yes	Good	Table 3
Makarabhirom et al., 2015	Motor-phonetic	Speech assistant & parent (home)	36	C006		9	7	115	M	BCLP	3	2	1	Yes	Not	Table 3
Makarabhirom et al., 2015	Motor-phonetic	Speech assistant & parent (home)	36	C007		8	7	103	M	UCLP	2	0	2	Yes	Good	Table 3
Makarabhirom et al., 2015	Motor-phonetic	Speech assistant & parent (home)	36	C009		12	3	147	F	BCLP	5	4	1	No	No	Table 3
Makarabhirom et al., 2015	Motor-phonetic	Speech assistant & parent (home)	36	C010		7	4	88	M	UCLP	8	3	5	Yes	Not	Table 3
Makarabhirom et al., 2015	Motor-phonetic	Speech assistant & parent (home)	36	C011		3	9	45	F	UCLP	7	6	1	No	No	Table 3
Makarabhirom et al., 2015	Motor-phonetic	Speech assistant & parent (home)	36	C012		11	1	133	M	BCLP	8	2	6	No	No	Table 3
Makarabhirom et al., 2015	Motor-phonetic	Speech assistant & parent (home)	36	C013		7	4	88	F	UCLP	5	1	4	Yes	Not	Table 3
Makarabhirom et al., 2015	Motor-phonetic	Speech assistant & parent (home)	36	C015		11	9	141	M	BCLP	1	0	1	Yes	Good	Table 3
Makarabhirom et al., 2015	Motor-phonetic	Speech assistant & parent (home)	36	C016	Missing value	4	8	56	M	UCLP				Excl	Excl	Table 3
Makarabhirom et al., 2015	Motor-phonetic	Speech assistant & parent (home)	36	C017		6	4	76	F	CP	1	0	1	Yes	Good	Table 3
Makarabhirom et al., 2015	Motor-phonetic	Speech assistant & parent (home)	36	C018		9	0	108	M	UCLP	3	0	3	Yes	Good	Table 3
Makarabhirom et al., 2015	Motor-phonetic	Speech assistant & parent (home)	36	C019		3	4	40	F	UCLP	5	1	4	Yes	Good	Table 3	l/r
Makarabhirom et al., 2015	Motor-phonetic	Speech assistant & parent (home)	36	C020		4	4	52	F	UCLP	3	1	2	Yes	Good	Table 3	l/r
Pamplona & Ysunza, 2018	Language/phonological	SLP (clinic)		1				43		UCLP	0	4	4	Yes	Not	Table 2	In this 2018 study, we considered relevant change to be between 0/1 -> 2, 2/3 -> 4, 4-> 5 (or greater leaps).
Pamplona & Ysunza, 2018	Language/phonological	SLP (clinic)		2				45		UCLP	2	4	2	Yes	Not	Table 2
Pamplona & Ysunza, 2018	Language/phonological	SLP (clinic)		3				48		UCLP	1	4	3	Yes	Not	Table 2
Pamplona & Ysunza, 2018	Language/phonological	SLP (clinic)		4				49		UCLP	0	4	4	Yes	Not	Table 2
Pamplona & Ysunza, 2018	Language/phonological	SLP (clinic)		5				51		UCLP	0	3	3	Yes	Not	Table 2
Pamplona & Ysunza, 2018	Language/phonological	SLP (clinic)		6				51		UCLP	0	2	2	Yes	Not	Table 2
Pamplona & Ysunza, 2018	Language/phonological	SLP (clinic)		7				54		UCLP	1	4	3	Yes	Not	Table 2
Pamplona & Ysunza, 2018	Language/phonological	SLP (clinic)		8				56		UCLP	0	3	3	Yes	Not	Table 2
Pamplona & Ysunza, 2018	Language/phonological	SLP (clinic)		9				58		UCLP	1	4	3	Yes	Not	Table 2
Pamplona & Ysunza, 2018	Language/phonological	SLP (clinic)		10				60		UCLP	0	3	3	Yes	Not	Table 2
Pamplona & Ysunza, 2018	Language/phonological	SLP (clinic)		11				63		UCLP	1	4	3	Yes	Not	Table 2
Pamplona & Ysunza, 2018	Language/phonological	SLP (clinic)		12				66		UCLP	1	4	4	Yes	Not	Table 2
Pamplona & Ysunza, 2018	Language/phonological	SLP (clinic)		13				70		UCLP	0	4	4	Yes	Not	Table 2
Pamplona & Ysunza, 2018	Language/phonological	SLP (clinic)		14				76		UCLP	1	4	3	Yes	Not	Table 2
Pamplona & Ysunza, 2018	Language/phonological	SLP (clinic)		15				80		UCLP	2	5	3	Yes	Good	Table 2
Pamplona & Ysunza, 2018	Language/phonological	SLP (clinic)		16				81		UCLP	1	4	3	Yes	Not	Table 2
Pamplona & Ysunza, 2018	Language/phonological	SLP (clinic)		b1				45		UCLP	0	1	1	No	No	Table 3
Pamplona & Ysunza, 2018	Language/phonological	SLP (clinic)		b10				65		UCLP	0	0	0	No	No	Table 3
Pamplona & Ysunza, 2018	Language/phonological	SLP (clinic)		b11				68		UCLP	1	2	1	Yes	Not	Table 3
Pamplona & Ysunza, 2018	Language/phonological	SLP (clinic)		b12				71		UCLP	1	2	1	Yes	Not	Table 3
Pamplona & Ysunza, 2018	Language/phonological	SLP (clinic)		b13				74		UCLP	0	1	1	No	No	Table 3
Pamplona & Ysunza, 2018	Language/phonological	SLP (clinic)		b14				77		UCLP	1	2	1	Yes	Not	Table 3
Pamplona & Ysunza, 2018	Language/phonological	SLP (clinic)		b15				78		UCLP	2	3	1	No	No	Table 3
Pamplona & Ysunza, 2018	Language/phonological	SLP (clinic)		b16				79		UCLP	0	1	1	No	No	Table 3
Pamplona & Ysunza, 2018	Language/phonological	SLP (clinic)		b2				46		UCLP	0	1	1	No	No	Table 3
Pamplona & Ysunza, 2018	Language/phonological	SLP (clinic)		b3				47		UCLP	2	3	1	No	No	Table 3
Pamplona & Ysunza, 2018	Language/phonological	SLP (clinic)		b4				48		UCLP	1	3	2	Yes	Not	Table 3
Pamplona & Ysunza, 2018	Language/phonological	SLP (clinic)		b5				50		UCLP	1	2	1	Yes	Not	Table 3
Pamplona & Ysunza, 2018	Language/phonological	SLP (clinic)		b6				51		UCLP	0	0	0	No	No	Table 3
Pamplona & Ysunza, 2018	Language/phonological	SLP (clinic)		b7				53		UCLP	0	1	1	No	No	Table 3
Pamplona & Ysunza, 2018	Language/phonological	SLP (clinic)		b8				55		UCLP	0	1	1	No	No	Table 3
Pamplona & Ysunza, 2018	Language/phonological	SLP (clinic)		b9				61		UCLP	2	3	1	No	No	Table 3
Pamplona et al., 2014	Language/phonological	SLP (clinic)	4	1		3	2	38		UCLP	2	3	1	Yes	Not	Table 2	In this 2014 study, we considered relevant change to be between 0/1 ->2, 2->3, and 3->4 (or greater leaps).
Pamplona et al., 2014	Language/phonological	SLP (clinic)	4	2		3	3	39		UCLP	1	3	2	Yes	Not	Table 2
Pamplona et al., 2014	Language/phonological	SLP (clinic)	4	3		3	4	40		UCLP	2	3	1	Yes	Not	Table 2
Pamplona et al., 2014	Language/phonological	SLP (clinic)	4	4		3	6	42		UCLP	3	4	1	Yes	Good	Table 2
Pamplona et al., 2014	Language/phonological	SLP (clinic)	4	5		3	6	42		UCLP	1	3	2	Yes	Not	Table 2
Pamplona et al., 2014	Language/phonological	SLP (clinic)	4	6		3	6	42		UCLP	3	4	1	Yes	Good	Table 2
Pamplona et al., 2014	Language/phonological	SLP (clinic)	4	7		3	7	43		UCLP	0	2	2	Yes	Not	Table 2
Pamplona et al., 2014	Language/phonological	SLP (clinic)	4	8		3	7	43		UCLP	1	2	1	Yes	Not	Table 2
Pamplona et al., 2014	Language/phonological	SLP (clinic)	4	9		3	10	46		UCLP	2	3	1	Yes	Not	Table 2
Pamplona et al., 2014	Language/phonological	SLP (clinic)	4	10		4	3	51		UCLP	0	1	1	No	No	Table 2
Pamplona et al., 2014	Language/phonological	SLP (clinic)	4	11		4	4	52		UCLP	0	1	1	No	No	Table 2
Pamplona et al., 2014	Language/phonological	SLP (clinic)	4	12		4	4	52		UCLP	1	2	1	Yes	Not	Table 2
Pamplona et al., 2014	Language/phonological	SLP (clinic)	4	13		4	4	52		UCLP	1	3	2	Yes	Not	Table 2
Pamplona et al., 2014	Language/phonological	SLP (clinic)	4	14		4	5	53		UCLP	0	0	0	No	No	Table 2
Pamplona et al., 2014	Language/phonological	SLP (clinic)	4	15		4	8	56		UCLP	1	3	2	Yes	Not	Table 2
Pamplona et al., 2014	Language/phonological	SLP (clinic)	4	16		4	9	57		UCLP	2	3	1	Yes	Not	Table 2
Pamplona et al., 2014	Language/phonological	SLP (clinic)	4	17		4	10	58		UCLP	1	2	1	Yes	Not	Table 2
Pamplona et al., 2014	Language/phonological	SLP (clinic)	4	18		4	10	58		UCLP	0	2	2	Yes	Not	Table 2
Pamplona et al., 2014	Language/phonological	SLP (clinic)	4	19		4	11	59		UCLP	3	4	1	Yes	Good	Table 2
Pamplona et al., 2014	Language/phonological	SLP (clinic)	4	20		5	0	60		UCLP	2	3	1	Yes	Not	Table 2
Pamplona et al., 2014	Language/phonological	SLP (clinic)	4	21		5	0	60		UCLP	0	1	1	No	No	Table 2
Pamplona et al., 2014	Language/phonological	SLP (clinic)	4	22		5	1	61		UCLP	2	3	1	Yes	Not	Table 2
Pamplona et al., 2014	Language/phonological	SLP (clinic)	4	23		5	1	61		UCLP	2	3	1	Yes	Not	Table 2
Pamplona et al., 2014	Language/phonological	SLP (clinic)	4	24		5	1	61		UCLP	1	3	1	Yes	Not	Table 2
Pamplona et al., 2014	Language/phonological	SLP (clinic)	4	25		5	2	62		UCLP	2	3	1	Yes	Not	Table 2
Pamplona et al., 2014	Language/phonological	SLP (clinic)	4	26		5	3	63		UCLP	0	1	1	No	No	Table 2
Pamplona et al., 2014	Language/phonological	SLP (clinic)	4	27		5	3	63		UCLP	2	3	1	Yes	Not	Table 2
Pamplona et al., 2014	Language/phonological	SLP (clinic)	4	28		5	5	65		UCLP	1	3	1	Yes	Not	Table 2
Pamplona et al., 2014	Language/phonological	SLP (clinic)	4	29		5	5	65		UCLP	2	3	1	Yes	Not	Table 2
Pamplona et al., 2014	Language/phonological	SLP (clinic)	4	30		5	6	66		UCLP	0	0	0	No	No	Table 2
Pamplona et al., 2014	Language/phonological	SLP (clinic)	4	31		5	7	67		UCLP	2	3	1	Yes	Not	Table 2
Pamplona et al., 2014	Language/phonological	SLP (clinic)	4	32		5	9	69		UCLP	3	4	1	Yes	Good	Table 2
Pamplona et al., 2014	Language/phonological	SLP (clinic)	4	33		5	9	69		UCLP	2	3	1	Yes	Not	Table 2
Pamplona et al., 2014	Language/phonological	SLP (clinic)	4	34		5	10	70		UCLP	0	1	1	No	No	Table 2
Pamplona et al., 2014	Language/phonological	SLP (clinic)	4	35		5	10	70		UCLP	1	2	1	Yes	Not	Table 2
Pamplona et al., 2014	Language/phonological	SLP (clinic)	4	36		5	11	71		UCLP	1	3	2	Yes	Not	Table 2
Pamplona et al., 2014	Language/phonological	SLP (clinic)	4	37		6	0	72		UCLP	2	3	1	Yes	Not	Table 2
Pamplona et al., 2014	Language/phonological	SLP (clinic)	4	38		6	0	72		UCLP	0	1	1	No	No	Table 2
Pamplona et al., 2014	Language/phonological	SLP (clinic)	4	39		6	0	72		UCLP	2	4	2	Yes	Good	Table 2
Pamplona et al., 2014	Language/phonological	SLP (clinic)	4	40		6	1	73		UCLP	2	4	2	Yes	Good	Table 2
Pamplona et al., 2014	Language/phonological	SLP (clinic)	4	41		6	1	73		UCLP	1	3	2	Yes	Not	Table 2
Pamplona et al., 2014	Language/phonological	SLP (clinic)	4	42		6	2	74		UCLP	1	3	2	Yes	Not	Table 2
Pamplona et al., 2014	Language/phonological	SLP (clinic)	4	43		6	2	74		UCLP	0	1	1	No	No	Table 2
Pamplona et al., 2014	Language/phonological	SLP (clinic)	4	44		6	4	76		UCLP	0	1	1	No	No	Table 2
Pamplona et al., 2014	Language/phonological	SLP (clinic)	4	45		6	4	76		UCLP	1	3	2	Yes	Not	Table 2
Pamplona et al., 2014	Language/phonological	SLP (clinic)	4	b1		3	0	36		UCLP	1	3	2	Yes	Not	Table 3
Pamplona et al., 2014	Language/phonological	SLP (clinic)	4	b10		4	0	48		UCLP	0	2	2	Yes	Not	Table 3
Pamplona et al., 2014	Language/phonological	SLP (clinic)	4	b11		4	1	49		UCLP	2	4	2	Yes	Good	Table 3
Pamplona et al., 2014	Language/phonological	SLP (clinic)	4	b12		4	4	52		UCLP	1	3	2	Yes	Not	Table 3
Pamplona et al., 2014	Language/phonological	SLP (clinic)	4	b13		4	4	52		UCLP	0	3	3	Yes	Not	Table 3
Pamplona et al., 2014	Language/phonological	SLP (clinic)	4	b14		4	6	54		UCLP	0	4	4	Yes	Good	Table 3
Pamplona et al., 2014	Language/phonological	SLP (clinic)	4	b15		4	6	54		UCLP	1	3	2	Yes	Not	Table 3
Pamplona et al., 2014	Language/phonological	SLP (clinic)	4	b16		4	8	56		UCLP	1	3	2	Yes	Not	Table 3
Pamplona et al., 2014	Language/phonological	SLP (clinic)	4	b17		4	9	57		UCLP	1	3	2	Yes	Not	Table 3
Pamplona et al., 2014	Language/phonological	SLP (clinic)	4	b18		4	11	59		UCLP	1	3	2	Yes	Not	Table 3
Pamplona et al., 2014	Language/phonological	SLP (clinic)	4	b19		4	11	59		UCLP	2	4	2	Yes	Good	Table 3
Pamplona et al., 2014	Language/phonological	SLP (clinic)	4	b2		3	0	36		UCLP	1	3	2	Yes	Not	Table 3
Pamplona et al., 2014	Language/phonological	SLP (clinic)	4	b20		4	11	59		UCLP	0	3	3	Yes	Not	Table 3
Pamplona et al., 2014	Language/phonological	SLP (clinic)	4	b21		5	1	61		UCLP	0	3	3	Yes	Not	Table 3
Pamplona et al., 2014	Language/phonological	SLP (clinic)	4	b22		5	2	62		UCLP	0	3	3	Yes	Not	Table 3
Pamplona et al., 2014	Language/phonological	SLP (clinic)	4	b23		5	3	63		UCLP	2	4	2	Yes	Good	Table 3
Pamplona et al., 2014	Language/phonological	SLP (clinic)	4	b24		5	3	63		UCLP	0	2	2	Yes	Not	Table 3
Pamplona et al., 2014	Language/phonological	SLP (clinic)	4	b25		5	3	63		UCLP	1	3	2	Yes	Not	Table 3
Pamplona et al., 2014	Language/phonological	SLP (clinic)	4	b26		5	4	64		UCLP	0	3	3	Yes	Not	Table 3
Pamplona et al., 2014	Language/phonological	SLP (clinic)	4	b27		5	4	64		UCLP	0	3	3	Yes	Not	Table 3
Pamplona et al., 2014	Language/phonological	SLP (clinic)	4	b28		5	6	66		UCLP	2	4	2	Yes	Good	Table 3
Pamplona et al., 2014	Language/phonological	SLP (clinic)	4	b29		5	7	67		UCLP	0	2	2	Yes	Not	Table 3
Pamplona et al., 2014	Language/phonological	SLP (clinic)	4	b3		3	1	37		UCLP	2	4	2	Yes	Good	Table 3
Pamplona et al., 2014	Language/phonological	SLP (clinic)	4	b30		5	7	67		UCLP	2	4	2	Yes	Good	Table 3
Pamplona et al., 2014	Language/phonological	SLP (clinic)	4	b31		5	8	68		UCLP	0	2	2	Yes	Not	Table 3
Pamplona et al., 2014	Language/phonological	SLP (clinic)	4	b32		5	9	69		UCLP	1	3	2	Yes	Not	Table 3
Pamplona et al., 2014	Language/phonological	SLP (clinic)	4	b33		5	9	69		UCLP	1	4	3	Yes	Good	Table 3
Pamplona et al., 2014	Language/phonological	SLP (clinic)	4	b34		5	9	69		UCLP	0	3	3	Yes	Not	Table 3
Pamplona et al., 2014	Language/phonological	SLP (clinic)	4	b35		5	10	70		UCLP	1	4	3	Yes	Good	Table 3
Pamplona et al., 2014	Language/phonological	SLP (clinic)	4	b36		5	10	70		UCLP	1	4	3	Yes	Good	Table 3
Pamplona et al., 2014	Language/phonological	SLP (clinic)	4	b37		5	11	71		UCLP	3	4	1	Yes	Good	Table 3
Pamplona et al., 2014	Language/phonological	SLP (clinic)	4	b38		6	0	72		UCLP	2	4	2	Yes	Good	Table 3
Pamplona et al., 2014	Language/phonological	SLP (clinic)	4	b39		6	1	73		UCLP	1	3	2	Yes	Not	Table 3
Pamplona et al., 2014	Language/phonological	SLP (clinic)	4	b4		3	2	38		UCLP	3	4	1	Yes	Good	Table 3
Pamplona et al., 2014	Language/phonological	SLP (clinic)	4	b40		6	3	75		UCLP	0	4	4	Yes	Good	Table 3
Pamplona et al., 2014	Language/phonological	SLP (clinic)	4	b41		6	5	77		UCLP	2	3	1	Yes	Not	Table 3
Pamplona et al., 2014	Language/phonological	SLP (clinic)	4	b42		6	7	79		UCLP	2	4	2	Yes	Good	Table 3
Pamplona et al., 2014	Language/phonological	SLP (clinic)	4	b43		6	7	79		UCLP	2	4	2	Yes	Good	Table 3
Pamplona et al., 2014	Language/phonological	SLP (clinic)	4	b44		6	8	80		UCLP	1	3	2	Yes	Not	Table 3
Pamplona et al., 2014	Language/phonological	SLP (clinic)	4	b45		6	8	80		UCLP	1	4	3	Yes	Good	Table 3
Pamplona et al., 2014	Language/phonological	SLP (clinic)	4	b5		3	4	40		UCLP	2	4	2	Yes	Good	Table 3
Pamplona et al., 2014	Language/phonological	SLP (clinic)	4	b6		3	4	40		UCLP	1	3	2	Yes	Not	Table 3
Pamplona et al., 2014	Language/phonological	SLP (clinic)	4	b7		3	5	41		UCLP	0	3	3	Yes	Not	Table 3
Pamplona et al., 2014	Language/phonological	SLP (clinic)	4	b8		3	7	43		UCLP	2	4	2	Yes	Good	Table 3
Pamplona et al., 2014	Language/phonological	SLP (clinic)	4	b9		3	10	46		UCLP	3	4	1	Yes	Good	Table 3
Pamplona et al., 2017	Language/phonological	SLP (clinic)	3	1				36		UCLP	0	2	2	Yes	Not	Table 2	In this 2017 study, we considered relevant change to be between 0/1 -> 2, 2/3/4 -> 5, 5 -> 6 (or greater leaps).
Pamplona et al., 2017	Language/phonological	SLP (clinic)	3	2				36		UCLP	0	4	4	Yes	Not	Table 2
Pamplona et al., 2017	Language/phonological	SLP (clinic)	3	3				38		UCLP	0	2	2	Yes	Not	Table 2
Pamplona et al., 2017	Language/phonological	SLP (clinic)	3	4				39		UCLP	0	3	3	Yes	Not	Table 2
Pamplona et al., 2017	Language/phonological	SLP (clinic)	3	5				40		UCLP	1	4	3	Yes	Not	Table 2
Pamplona et al., 2017	Language/phonological	SLP (clinic)	3	6				41		UCLP	1	3	2	Yes	Not	Table 2
Pamplona et al., 2017	Language/phonological	SLP (clinic)	3	7				42		UCLP	0	3	3	Yes	Not	Table 2
Pamplona et al., 2017	Language/phonological	SLP (clinic)	3	8				43		UCLP	0	2	2	Yes	Not	Table 2
Pamplona et al., 2017	Language/phonological	SLP (clinic)	3	9				44		UCLP	0	1	1	No	No	Table 2
Pamplona et al., 2017	Language/phonological	SLP (clinic)	3	10				46		UCLP	1	4	3	Yes	Not	Table 2
Pamplona et al., 2017	Language/phonological	SLP (clinic)	3	11				47		UCLP	0	2	2	Yes	Not	Table 2
Pamplona et al., 2017	Language/phonological	SLP (clinic)	3	12				49		UCLP	0	2	2	Yes	Not	Table 2
Pamplona et al., 2017	Language/phonological	SLP (clinic)	3	13				51		UCLP	1	4	3	Yes	Not	Table 2
Pamplona et al., 2017	Language/phonological	SLP (clinic)	3	14				54		UCLP	1	4	3	Yes	Not	Table 2
Pamplona et al., 2017	Language/phonological	SLP (clinic)	3	15				56		UCLP	1	4	3	Yes	Not	Table 2
Pamplona et al., 2017	Language/phonological	SLP (clinic)	3	16				56		UCLP	3	5	2	Yes	Not	Table 2
Pamplona et al., 2017	Language/phonological	SLP (clinic)	3	17				57		UCLP	1	3	2	Yes	Not	Table 2
Pamplona et al., 2017	Language/phonological	SLP (clinic)	3	18				57		UCLP	3	4	1	No	No	Table 2
Pamplona et al., 2017	Language/phonological	SLP (clinic)	3	19				60		UCLP	1	4	3	Yes	Not	Table 2
Pamplona et al., 2017	Language/phonological	SLP (clinic)	3	20				60		UCLP	0	2	2	Yes	Not	Table 2
Pamplona et al., 2017	Language/phonological	SLP (clinic)	3	21				61		UCLP	0	3	3	Yes	Not	Table 2
Pamplona et al., 2017	Language/phonological	SLP (clinic)	3	22				63		UCLP	0	2	2	Yes	Not	Table 2
Pamplona et al., 2017	Language/phonological	SLP (clinic)	3	23				64		UCLP	1	3	2	Yes	Not	Table 2
Pamplona et al., 2017	Language/phonological	SLP (clinic)	3	24				64		UCLP	2	3	1	No	No	Table 2
Pamplona et al., 2017	Language/phonological	SLP (clinic)	3	25				66		UCLP	1	3	2	Yes	Not	Table 2
Pamplona et al., 2017	Language/phonological	SLP (clinic)	3	26				66		UCLP	1	3	2	Yes	Not	Table 2
Pamplona et al., 2017	Language/phonological	SLP (clinic)	3	27				67		UCLP	1	3	2	Yes	Not	Table 2
Pamplona et al., 2017	Language/phonological	SLP (clinic)	3	28				68		UCLP	1	3	2	Yes	Not	Table 2
Pamplona et al., 2017	Language/phonological	SLP (clinic)	3	29				69		UCLP	2	4	2	No	No	Table 2
Pamplona et al., 2017	Language/phonological	SLP (clinic)	3	30				69		UCLP	0	2	2	Yes	Not	Table 2
Pamplona et al., 2017	Language/phonological	SLP (clinic)	3	31				70		UCLP	1	3	2	Yes	Not	Table 2
Pamplona et al., 2017	Language/phonological	SLP (clinic)	3	32				71		UCLP	1	3	2	Yes	Not	Table 2
Pamplona et al., 2017	Language/phonological	SLP (clinic)	3	33				71		UCLP	0	3	3	Yes	Not	Table 2
Pamplona et al., 2017	Language/phonological	SLP (clinic)	3	34				72		UCLP	1	4	3	Yes	Not	Table 2
Pamplona et al., 2017	Language/phonological	SLP (clinic)	3	35				73		UCLP	1	3	2	Yes	Not	Table 2
Pamplona et al., 2017	Language/phonological	SLP (clinic)	3	36				74		UCLP	2	4	2	No	No	Table 2
Pamplona et al., 2017	Language/phonological	SLP (clinic)	3	37				75		UCLP	0	3	3	Yes	Not	Table 2
Pamplona et al., 2017	Language/phonological	SLP (clinic)	3	38				75		UCLP	0	3	3	Yes	Not	Table 2
Pamplona et al., 2017	Language/phonological	SLP (clinic)	3	39				75		UCLP	0	3	3	Yes	Not	Table 2
Pamplona et al., 2017	Language/phonological	SLP (clinic)	3	40				76		UCLP	1	5	4	Yes	Not	Table 2
Pamplona et al., 2017	Language/phonological	SLP (clinic)	3	41				77		UCLP	0	3	3	Yes	Not	Table 2
Prathanee et al., 2014	Motor-phonetic	Speech assistant (home)	36	C01		5	1	61	F	UCLP	15	2	13	Yes	Not	Table 3	Good if only one deviation
Prathanee et al., 2014	Motor-phonetic	Speech assistant (home)	36	C02		4	6	54	F	CP	16	0	16	Yes	Good	Table 3
Prathanee et al., 2014	Motor-phonetic	Speech assistant (home)	36	C03		4	1	49	F	UCLP	23	3	20	Yes	Good	Table 3
Prathanee et al., 2014	Motor-phonetic	Speech assistant (home)	36	C04		4	5	53	M	BCLP	19	12	7	Yes	Not	Table 3
Prathanee et al., 2014	Motor-phonetic	Speech assistant (home)	36	C05		5	3	63	M	UCLP	18	5	13	Yes	Not	Table 3
Prathanee et al., 2014	Motor-phonetic	Speech assistant (home)	36	C06		5	9	69	F	UCLP	13	1	12	Yes	Good	Table 3
Prathanee et al., 2014	Motor-phonetic	Speech assistant (home)	36	C07		5	0	60	F	CP	13	2	11	Yes	Not	Table 3
Prathanee et al., 2014	Motor-phonetic	Speech assistant (home)	36	C08		7	1	85	M	CP	15	3	12	Yes	Not	Table 3
Prathanee et al., 2014	Motor-phonetic	Speech assistant (home)	36	C09		7	7	91	M	CP	6	0	6	Yes	Good	Table 3
Prathanee et al., 2014	Motor-phonetic	Speech assistant (home)	36	C10		7	8	92	F	UCLP	19	10	9	Yes	Not	Table 3
Prathanee et al., 2014	Motor-phonetic	Speech assistant (home)	36	C11		4	3	51	M	BCLP	17	1	16	Yes	Good	Table 3
Prathanee et al., 2014	Motor-phonetic	Speech assistant (home)	36	C12		4	4	52	M	UCLP	11	1	10	Yes	Good	Table 3
Prathanee et al., 2014	Motor-phonetic	Speech assistant (home)	36	C16		7	1	85	M	BCLP	14	5	9	Yes	Not	Table 3
Prathanee et al., 2014	Motor-phonetic	Speech assistant (home)	36	C18		8	0	96	M	CP	7	1	6	Yes	Good	Table 3
Prathanee et al., 2014	Motor-phonetic	Speech assistant (home)	36	C19		6	11	83	F	CP	16	10	6	Yes	Not	Table 3
Prathanee et al., 2014	Motor-phonetic	Speech assistant (home)	36	C20		6	1	73	M	UCLP	11	1	10	Yes	Good	Table 3
Prathanee et al., 2020	Motor-phonetic	Speech assistant & parent (home)	48	L002		4.8		57.6	F	UCLP	2	1	1	Yes	Good	Table 3
Prathanee et al., 2020	Motor-phonetic	Speech assistant & parent (home)	48	L003		5.3		63.6	M	UCLP	10	6	4	Yes	Not	Table 3
Prathanee et al., 2020	Motor-phonetic	Speech assistant & parent (home)	48	L004		3.6		43.2	F	BCLP	4	1	3	Yes	Good	Table 3
Prathanee et al., 2020	Motor-phonetic	Speech assistant & parent (home)	48	L007		16		192	M	UCLP	15	8	7	Yes	Not	Table 3
Prathanee et al., 2020	Motor-phonetic	Speech assistant & parent (home)	48	L009		6.1		73.2	F	UCLP	5	4	1	No	No	Table 3
Prathanee et al., 2020	Motor-phonetic	Speech assistant & parent (home)	48	L012		3.7		44.4	F	UCLP	14	2	12	Yes	Good	Table 3
Prathanee et al., 2020	Motor-phonetic	Speech assistant & parent (home)	48	L013		3.6		43.2	M	UCLP	14	2	12	Yes	Good	Table 3
Prathanee et al., 2020	Motor-phonetic	Speech assistant & parent (home)	48	L014		15.3		183.6	F	BCLP	4	2	2	Yes	Not	Table 3
Prathanee et al., 2020	Motor-phonetic	Speech assistant & parent (home)	48	L015		7.4		88.8	M	UCLP	18	2	16	Yes	Not	Table 3
Prathanee et al., 2020	Motor-phonetic	Speech assistant & parent (home)	48	L016		4.1		49.2	M	BCLP	21	18	3	No	No	Table 3
Prathanee et al., 2020	Motor-phonetic	Speech assistant & parent (home)	48	L020		4.1		49.2	F	UCLP	15	2	13	Yes	Good	Table 3
Prathanee et al., 2020	Motor-phonetic	Speech assistant & parent (home)	48	L024		9.1		109.2	M	CP	3	0	3	Yes	Good	Table 3
Prathanee, 2011	Motor-phonetic	Speech assistant & parent (home)	24	1		7	2	86		CP	4	0	4	Yes	Good	Table 3	Good if only l/r deviation
Prathanee, 2011	Motor-phonetic	Speech assistant & parent (home)	24	2	Missing value	11	5	137		CP	4			Excl	Excl	Table 3
Prathanee, 2011	Motor-phonetic	Speech assistant & parent (home)	24	3		8	0	96		UCLP	9	4	5	No	No	Table 3
Prathanee, 2011	Motor-phonetic	Speech assistant & parent (home)	24	4		7	0	84		UCLP	4	2	2	No	No	Table 3
Prathanee, 2011	Motor-phonetic	Speech assistant & parent (home)	24	5		6	3	75		CL	3	1	2	Yes	Good	Table 3	l/r
Prathanee, 2011	Motor-phonetic	Speech assistant & parent (home)	24	6		12	6	150		UCLP	11	5	6	Yes	Not	Table 3
Prathanee, 2011	Motor-phonetic	Speech assistant & parent (home)	24	7		4	6	54		UCLP	13	7	6	Yes	Not	Table 3
Prathanee, 2011	Motor-phonetic	Speech assistant & parent (home)	24	8	Only [l/r] substitutions	10	11	131		CP	2	1		Excl	Excl	Table 3
Prathanee, 2011	Motor-phonetic	Speech assistant & parent (home)	24	9		12	5	149		BCLP	5	1	4	Yes	Not	Table 3
Prathanee, 2011	Motor-phonetic	Speech assistant & parent (home)	24	10		9	11	119		BCLP	6	0	6	Yes	Good	Table 3
Prathanee, 2011	Motor-phonetic	Speech assistant & parent (home)	24	11		10	0	120		UCLP	7	2	5	Yes	Not	Table 3
Prathanee, 2011	Motor-phonetic	Speech assistant & parent (home)	24	12	Only [l/r] substitutions	11	3	135		UCLP	1	0		Excl	Excl	Table 3
Prathanee, 2011	Motor-phonetic	Speech assistant & parent (home)	24	13	Missing value	10	2	122		BCLP		2		Excl	Excl	Table 3
Pumnum et al., 2015	Motor-phonetic	Speech assistant & parent (home)	36	1		7	7	91	M	CP	6	0	6	Yes	Good	Table 2
Pumnum et al., 2015	Motor-phonetic	Speech assistant & parent (home)	36	2		7	8	92	F	UCLP	16	9	7	Yes	Not	Table 2
Pumnum et al., 2015	Motor-phonetic	Speech assistant & parent (home)	36	3	No speech deviation	8	1	97	M	CP	3	2	1	Excl	Excl	Table 2
Pumnum et al., 2015	Motor-phonetic	Speech assistant & parent (home)	36	4	No speech deviation	8	7	103	M	CP	0	0	0	Excl	Excl	Table 2
Pumnum et al., 2015	Motor-phonetic	Speech assistant & parent (home)	36	5		8	8	104	F	UCLP	8	7	1	No	No	Table 2
Pumnum et al., 2015	Motor-phonetic	Speech assistant & parent (home)	36	6		5	8	68	F	CP	7	5	2	No	No	Table 2
Roxburgh et al., 2016	Motor-phonetic	SLP (clinic)	2	Andrew		9	2	110	M	CP	8.88889	26	17.1111	No	No	Figure 2; Pre VAM & Post VAM	Good according to reference value in SVANTE or for younger - clinical estimation
Roxburgh et al., 2016	Motor-phonetic	SLP (clinic)	2	Craig		6	2	74	M	CP	23.4495	81.5304	58.0809	Yes	Not	Figure 1; Pre VAM & Post VAM	https://automeris.io/WebPlotDigitizer/userManual.pdf
Scherer et al., 2008	Motor-phonetic	Parent (home)	12	1				30	F	UCLP	30.2715	48.5562	18.2847	Yes	Not	Figure 4	Good according to reference value in SVANTE or for younger - clinical estimation
Scherer et al., 2008	Motor-phonetic	Parent (home)	12	2				24	M	UCLP	30.3541	50.808	20.4539	Yes	Good	Figure 4	https://automeris.io/WebPlotDigitizer/userManual.pdf
Scherer et al., 2008	Motor-phonetic	Parent (home)	12	3				28	M	UCLP	30.3647	24.61	-5.75472	No	No	Figure 4
Scherer et al., 2008	Motor-phonetic	Parent (home)	12	4				35	F	UCLP	54.4182	70.9295	16.5113	Yes	Good	Figure 4
Scherer et al., 2008	Motor-phonetic	Parent (home)	12	5				35	M	UCLP	58.3186	63.5456	5.22699	No	No	Figure 4
Scherer et al., 2008	Motor-phonetic	Parent (home)	12	6				18	M	UCLP	29.837	52.4567	22.6197	Yes	Good	Figure 4
Scherer et al., 2008	Motor-phonetic	Parent (home)	12	7				21	F	UCLP	39.0679	51.4378	12.37	Yes	Good	Figure 4
Scherer et al., 2008	Motor-phonetic	Parent (home)	12	8				27	M	UCLP	56.3252	67.518	11.1928	Yes	Good	Figure 4
Scherer et al., 2008	Motor-phonetic	Parent (home)	12	9				31	F	UCLP	34.2652	56.4925	22.2273	Yes	Not	Figure 4
Scherer et al., 2008	Motor-phonetic	Parent (home)	12	10				25	F	UCLP	31.9798	56.5716	24.5918	Yes	Good	Figure 4
Sritacha et al., 2016	Motor-phonetic	Speech assistant & parent (home)	36	1C01		5	1	61	F	UCLP	11	1	10	Yes	Good	Table 3	Good if only one deviation
Sritacha et al., 2016	Motor-phonetic	Speech assistant & parent (home)	36	1C02		4	6	54	F	CP	11	0	11	Yes	Good	Table 3
Sritacha et al., 2016	Motor-phonetic	Speech assistant & parent (home)	36	1C03		4	1	49	F	UCLP	16	2	14	Yes	Not	Table 3
Sritacha et al., 2016	Motor-phonetic	Speech assistant & parent (home)	36	1C05		5	3	63	M	UCLP	15	4	11	Yes	Not	Table 3
Sritacha et al., 2016	Motor-phonetic	Speech assistant & parent (home)	36	2C01	No speech deviation	6	2	74	F	UCLP	1	1	0	Excl	Excl	Table 3
Sritacha et al., 2016	Motor-phonetic	Speech assistant & parent (home)	36	3C21		5	3	63	M	UCLP	6	2	4	Yes	Not	Table 3
Sritacha et al., 2016	Motor-phonetic	Speech assistant & parent (home)	36	3C30		6	0	72	M	CP	3	1	2	Yes	Good	Table 3
Van Demark & Hardin, 1986	Motor-phonetic	SLP (camp)	6	1		12	0	144	M	CP	71.1	98.7	27.6	Yes	Good	Table 4	Good according to reference value in SVANTE or for younger - clinical estimation
Van Demark & Hardin, 1986	Motor-phonetic	SLP (camp)	6	2		10	9	129	M	BCLP	75.8	91.3	15.5	Yes	Not	Table 4
Van Demark & Hardin, 1986	Motor-phonetic	SLP (camp)	6	3		8	8	104	F	BCLP	79.9	89.3	9.4	Yes	Not	Table 4
Van Demark & Hardin, 1986	Motor-phonetic	SLP (camp)	6	4		7	11	95	M	BCLP	30.9	37.8	6.9	No	No	Table 4
Van Demark & Hardin, 1986	Motor-phonetic	SLP (camp)	6	5		6	8	80	M	UCLP	60.4	77.9	17.5	Yes	Not	Table 4
Van Demark & Hardin, 1986	Motor-phonetic	SLP (camp)	6	6		7	4	88	M	UCLP	55.1	72.5	17.4	Yes	Not	Table 4
Van Demark & Hardin, 1986	Motor-phonetic	SLP (camp)	6	7		7	5	89	F	CP	56.4	77.9	21.5	Yes	Not	Table 4
Van Demark & Hardin, 1986	Motor-phonetic	SLP (camp)	6	8		8	3	99	M	UCLP	63.1	79.9	16.8	Yes	Not	Table 4
Van Demark & Hardin, 1986	Motor-phonetic	SLP (camp)	6	9		7	4	88	M	UCLP	73.2	89.9	16.7	Yes	Not	Table 4
Van Demark & Hardin, 1986	Motor-phonetic	SLP (camp)	6	10		9	10	118	M	BCLP	61.1	66.4	5.3	No	No	Table 4
Van Demark & Hardin, 1986	Motor-phonetic	SLP (camp)	6	11		10	0	120	F	CP	89.9	99.3	9.4	Yes	Good	Table 4
Van Demark & Hardin, 1986	Motor-phonetic	SLP (camp)	6	12		8	3	99	M	CP	76.5	96	19.5	Yes	Not	Table 4
Van Demark & Hardin, 1986	Motor-phonetic	SLP (camp)	6	13		8	10	106	F	CP	70.5	87.3	16.8	Yes	Not	Table 4

## Sheet: Language
Study	TherapyType	Delivery	Duration	Patient	Exclusion	Year	Y:Month	Months	Gender	Cleft	Pre	Post	Difference	RelevantC	EndPoint	Source	Note
Hanchanlert et al., 2015	Motor-phonetic	Speech assistant & parent (home)	36	1		7	1	85	M	BCLP	Pass	Pass	No	No	EGood	Table 2
Hanchanlert et al., 2015	Motor-phonetic	Speech assistant & parent (home)	36	2		8	0	96	M	CP	Pass	Pass	No	No	EGood	Table 2
Hanchanlert et al., 2015	Motor-phonetic	Speech assistant & parent (home)	36	3		3	11	47	M	BCLP	Pass	Pass	No	No	EGood	Table 2
Hanchanlert et al., 2015	Motor-phonetic	Speech assistant & parent (home)	36	4	Second year for child 1	8	1	97	M	BCLP	Pass	Pass	No	Excl	Excl	Table 2	Personal communication about patient returning to treatment.
Hanchanlert et al., 2015	Motor-phonetic	Speech assistant & parent (home)	36	5	Second year for child 2	8	11	107	M	CP	Pass	Pass	No	Excl	Excl	Table 2	Personal communication about patient returning to treatment.
Hanchanlert et al., 2015	Motor-phonetic	Speech assistant & parent (home)	36	6		4	3	51	M	BCLP	Delayed	Delayed	No	No	No	Table 2
Hanchanlert et al., 2015	Motor-phonetic	Speech assistant & parent (home)	36	7		4	4	52	M	UCLP	Pass	Pass	No	No	EGood	Table 2
Hanchanlert et al., 2015	Motor-phonetic	Speech assistant & parent (home)	36	8		10	4	124	F	UCLP	Pass	Pass	No	No	EGood	Table 2
Hanchanlert et al., 2015	Motor-phonetic	Speech assistant & parent (home)	36	9	Second year for child 6	7	7	91	M	BCLP	Pass	Pass	No	Excl	Excl	Table 2	Personal communication about patient returning to treatment.
Hanchanlert et al., 2015	Motor-phonetic	Speech assistant & parent (home)	36	10	Third year for child 6	5	2	62	M	BCLP	Delayed	Delayed	No	Excl	Excl	Table 2	Personal communication about patient returning to treatment.
Hanchanlert et al., 2015	Motor-phonetic	Speech assistant & parent (home)	36	11	Second year for child 7	5	4	64	M	UCLP	Pass	Pass	No	Excl	Excl	Table 2	Personal communication about patient returning to treatment.
Pamplona & Ysunza, 2000	Language/phonological	SLP (clinic)	52	1		3-4,8				UCLP	2	4	2	Yes	Not	Table 3	Skulle tro att 4 kan värderas som Good hos de yngsta (3 år) och 5 hos de äldre (4-5 år). Men ålder kan inte läsas ut/individ..Löses genom att vi värderar endast 5 som Good (AL/EH)
Pamplona & Ysunza, 2000	Language/phonological	SLP (clinic)	52	2		3-4,8				UCLP	1	2	1	No	No	Table 3
Pamplona & Ysunza, 2000	Language/phonological	SLP (clinic)	52	3		3-4,8				UCLP	1	3	2	Yes	Not	Table 3
Pamplona & Ysunza, 2000	Language/phonological	SLP (clinic)	52	4		3-4,8				UCLP	3	3	0	No	No	Table 3
Pamplona & Ysunza, 2000	Language/phonological	SLP (clinic)	52	5		3-4,8				UCLP	2	3	1	No	No	Table 3
Pamplona & Ysunza, 2000	Language/phonological	SLP (clinic)	52	6		3-4,8				UCLP	1	2	1	No	No	Table 3
Pamplona & Ysunza, 2000	Language/phonological	SLP (clinic)	52	7		3-4,8				UCLP	1	2	1	No	No	Table 3
Pamplona & Ysunza, 2000	Language/phonological	SLP (clinic)	52	8		3-4,8				UCLP	3	3	0	No	No	Table 3
Pamplona & Ysunza, 2000	Language/phonological	SLP (clinic)	52	9		3-4,8				UCLP	2	4	2	Yes	Not	Table 3
Pamplona & Ysunza, 2000	Language/phonological	SLP (clinic)	52	10		3-4,8				UCLP	1	3	2	Yes	Not	Table 3
Pamplona & Ysunza, 2000	Language/phonological	SLP (clinic)	52	11		3-4,8				UCLP	3	3	0	No	No	Table 3
Pamplona & Ysunza, 2000	Language/phonological	SLP (clinic)	52	12		3-4,8				UCLP	3	4	1	No	No	Table 3
Pamplona & Ysunza, 2000	Language/phonological	SLP (clinic)	52	13		3-4,8				UCLP	1	2	1	No	No	Table 3
Pamplona & Ysunza, 2000	Language/phonological	SLP (clinic)	52	14		3-4,8				UCLP	2	4	2	Yes	Not	Table 3
Pamplona & Ysunza, 2000	Language/phonological	SLP (clinic)	52	15		3-4,8				UCLP	1	2	1	No	No	Table 3
Pamplona & Ysunza, 2000	Language/phonological	SLP (clinic)	52	16		3-4,8				UCLP	1	3	2	Yes	Not	Table 3
Pamplona & Ysunza, 2000	Language/phonological	SLP (clinic)	52	17		3-4,8				UCLP	1	2	1	No	No	Table 3
Pamplona & Ysunza, 2000	Language/phonological	SLP (clinic)	52	18		3-4,8				UCLP	3	4	1	No	No	Table 3
Pamplona & Ysunza, 2000	Language/phonological	SLP (clinic)	52	19		3-4,8				UCLP	1	3	2	Yes	Not	Table 3
Pamplona & Ysunza, 2000	Language/phonological	SLP (clinic)	52	20		3-4,8				UCLP	1	2	1	No	No	Table 3
Pamplona & Ysunza, 2000	Language/phonological	SLP (clinic)	52	b1		3-4,8				UCLP	1	3	2	Yes	Not	Table 4
Pamplona & Ysunza, 2000	Language/phonological	SLP (clinic)	52	b10		3-4,8				UCLP	3	5	2	Yes	Good	Table 4
Pamplona & Ysunza, 2000	Language/phonological	SLP (clinic)	52	b11		3-4,8				UCLP	1	3	2	Yes	Not	Table 4
Pamplona & Ysunza, 2000	Language/phonological	SLP (clinic)	52	b12		3-4,8				UCLP	3	5	2	Yes	Good	Table 4
Pamplona & Ysunza, 2000	Language/phonological	SLP (clinic)	52	b13		3-4,8				UCLP	2	5	3	Yes	Good	Table 4
Pamplona & Ysunza, 2000	Language/phonological	SLP (clinic)	52	b14		3-4,8				UCLP	1	4	3	Yes	Not	Table 4
Pamplona & Ysunza, 2000	Language/phonological	SLP (clinic)	52	b15		3-4,8				UCLP	3	5	2	Yes	Good	Table 4
Pamplona & Ysunza, 2000	Language/phonological	SLP (clinic)	52	b16		3-4,8				UCLP	1	3	2	Yes	Not	Table 4
Pamplona & Ysunza, 2000	Language/phonological	SLP (clinic)	52	b17		3-4,8				UCLP	1	4	3	Yes	Not	Table 4
Pamplona & Ysunza, 2000	Language/phonological	SLP (clinic)	52	b18		3-4,8				UCLP	2	4	2	Yes	Not	Table 4
Pamplona & Ysunza, 2000	Language/phonological	SLP (clinic)	52	b19		3-4,8				UCLP	1	4	3	Yes	Not	Table 4
Pamplona & Ysunza, 2000	Language/phonological	SLP (clinic)	52	b2		3-4,8				UCLP	1	4	3	Yes	Not	Table 4
Pamplona & Ysunza, 2000	Language/phonological	SLP (clinic)	52	b20		3-4,8				UCLP	3	5	2	Yes	Good	Table 4
Pamplona & Ysunza, 2000	Language/phonological	SLP (clinic)	52	b21		3-4,8				UCLP	1	3	2	Yes	Not	Table 4
Pamplona & Ysunza, 2000	Language/phonological	SLP (clinic)	52	b3		3-4,8				UCLP	2	4	2	Yes	Not	Table 4
Pamplona & Ysunza, 2000	Language/phonological	SLP (clinic)	52	b4		3-4,8				UCLP	1	4	3	Yes	Not	Table 4
Pamplona & Ysunza, 2000	Language/phonological	SLP (clinic)	52	b5		3-4,8				UCLP	2	4	2	Yes	Not	Table 4
Pamplona & Ysunza, 2000	Language/phonological	SLP (clinic)	52	b6		3-4,8				UCLP	1	3	2	Yes	Not	Table 4
Pamplona & Ysunza, 2000	Language/phonological	SLP (clinic)	52	b7		3-4,8				UCLP	3	5	2	Yes	Good	Table 4
Pamplona & Ysunza, 2000	Language/phonological	SLP (clinic)	52	b8		3-4,8				UCLP	1	4	3	Yes	Not	Table 4
Pamplona & Ysunza, 2000	Language/phonological	SLP (clinic)	52	b9		3-4,8				UCLP	2	5	3	Yes	Good	Table 4
Prathanee et al., 2020	Motor-phonetic	Speech assistant & parent (home)	48	L002		4.8		57.6	F	UCLP	Normal	Delayed	Negative	No	No	Table 2
Prathanee et al., 2020	Motor-phonetic	Speech assistant & parent (home)	48	L003		5.3		63.6	M	UCLP	Delayed	Normal	Yes	Yes	Good	Table 2
Prathanee et al., 2020	Motor-phonetic	Speech assistant & parent (home)	48	L004		3.6		43.2	F	BCLP	Normal	Delayed	Negative	No	No	Table 2
Prathanee et al., 2020	Motor-phonetic	Speech assistant & parent (home)	48	L007		16		192	M	UCLP	Normal	Normal	No	No	EGood	Table 2
Prathanee et al., 2020	Motor-phonetic	Speech assistant & parent (home)	48	L009		6.1		73.2	F	UCLP	Delayed	Normal	Yes	Yes	Good	Table 2
Prathanee et al., 2020	Motor-phonetic	Speech assistant & parent (home)	48	L012		3.7		44.4	F	UCLP	Delayed	Delayed	No	No	No	Table 2
Prathanee et al., 2020	Motor-phonetic	Speech assistant & parent (home)	48	L013		3.6		43.2	M	UCLP	Delayed	Delayed	No	No	No	Table 2
Prathanee et al., 2020	Motor-phonetic	Speech assistant & parent (home)	48	L014		15.3		183.6	F	BCLP	Delayed	Normal	Yes	Yes	Good	Table 2
Prathanee et al., 2020	Motor-phonetic	Speech assistant & parent (home)	48	L015		7.4		88.8	M	UCLP	Normal	Normal	No	No	EGood	Table 2
Prathanee et al., 2020	Motor-phonetic	Speech assistant & parent (home)	48	L016		4.1		49.2	M	BCLP	Normal	Normal	No	No	EGood	Table 2
Prathanee et al., 2020	Motor-phonetic	Speech assistant & parent (home)	48	L020	Missing value	4.1		49.2	F	UCLP	Normal			Excl	Excl	Table 2
Prathanee et al., 2020	Motor-phonetic	Speech assistant & parent (home)	48	L024		9.1		109.2	M	CP	Normal	Normal	No	No	EGood	Table 2
Pumnum et al., 2015	Motor-phonetic	Speech assistant & parent (home)	36	1		7	7	91	M	CP	Delayed	Pass	Yes	Yes	Good	Table 2
Pumnum et al., 2015	Motor-phonetic	Speech assistant & parent (home)	36	2		7	8	92	F	UCLP	Pass	Pass	No	No	EGood	Table 2
Pumnum et al., 2015	Motor-phonetic	Speech assistant & parent (home)	36	3	No speech deviation	8	1	97	M	CP	Delayed	Delayed	No	Excl	Excl	Table 2
Pumnum et al., 2015	Motor-phonetic	Speech assistant & parent (home)	36	4	No speech deviation	8	7	103	M	CP	Pass	Delayed	Negative	Excl	Excl	Table 2
Pumnum et al., 2015	Motor-phonetic	Speech assistant & parent (home)	36	5		8	8	104	F	UCLP	Pass	Pass	No	No	EGood	Table 2
Pumnum et al., 2015	Motor-phonetic	Speech assistant & parent (home)	36	6		5	8	68	F	CP	Pass	Pass	No	No	EGood	Table 2
Sritacha et al., 2016	Motor-phonetic	Speech assistant & parent (home)	36	1C01		5	1	61	F	UCLP	Pass	Pass	No	No	EGood	Table 3
Sritacha et al., 2016	Motor-phonetic	Speech assistant & parent (home)	36	1C02		4	6	54	F	CP	Pass	Pass	No	No	EGood	Table 3
Sritacha et al., 2016	Motor-phonetic	Speech assistant & parent (home)	36	1C03		4	1	49	F	UCLP	Pass	Pass	No	No	EGood	Table 3
Sritacha et al., 2016	Motor-phonetic	Speech assistant & parent (home)	36	1C05		5	3	63	M	UCLP	Delayed	Delayed	No	No	No	Table 3
Sritacha et al., 2016	Motor-phonetic	Speech assistant & parent (home)	36	2C01	No speech deviation	6	2	74	F	UCLP	Pass	Pass	No	Excl	Excl	Table 3
Sritacha et al., 2016	Motor-phonetic	Speech assistant & parent (home)	36	3C21		5	3	63	M	UCLP	Delayed	Pass	Yes	Yes	Good	Table 3
Sritacha et al., 2016	Motor-phonetic	Speech assistant & parent (home)	36	3C30		6	0	72	M	CP	Delayed	Pass	Yes	Yes	Good	Table 3

## Sheet: Intelligibility
Study	TherapyType	Delivery	Duration	Patient	Exclusion	Year	Y:Month	Months	Gender	Cleft	Pre	Post	Difference	RelevantC	EndPoint	Source	Note
Alighieri et al., 2019	Motor-phonetic	SLP (clinic)	0.428571	3		11.4		136.8	M	UCLP	Severe	Severe		No	No	Table 4 - Data point 2 - 3: pre to post treatment
Alighieri et al., 2019	Motor-phonetic	SLP (clinic)	0.428571	4		11.7		140.4	M	CP	Severe	Moderate		No	No	Table 4
Alighieri et al., 2019	Motor-phonetic	SLP (clinic)	0.428571	5	Too old	39.1		469.2	M	UCLP	Moderate	Mild		Excl	Excl	Table 4
Hanchanlert et al., 2015	Motor-phonetic	Speech assistant & parent (home)	36	1	Missing value	7	1	85	M	BCLP	NA	Mild	NA	Excl	Excl	Table 2
Hanchanlert et al., 2015	Motor-phonetic	Speech assistant & parent (home)	36	2	Missing value	8	0	96	M	CP	NA	Normal	NA	Excl	Excl	Table 2
Hanchanlert et al., 2015	Motor-phonetic	Speech assistant & parent (home)	36	3		3	11	47	M	BCLP	Normal	Normal	No	No	EGood	Table 2
Hanchanlert et al., 2015	Motor-phonetic	Speech assistant & parent (home)	36	4	Second year for child 1	8	1	97	M	BCLP	Moderate	Moderate	No	Excl	Excl	Table 2	Personal communication about patient returning to treatment.
Hanchanlert et al., 2015	Motor-phonetic	Speech assistant & parent (home)	36	5	Second year for child 2	8	11	107	M	CP	Normal	Normal	No	Excl	Excl	Table 2	Personal communication about patient returning to treatment.
Hanchanlert et al., 2015	Motor-phonetic	Speech assistant & parent (home)	36	6	Missing value	4	3	51	M	BCLP	NA	Mild	NA	Excl	Excl	Table 2
Hanchanlert et al., 2015	Motor-phonetic	Speech assistant & parent (home)	36	7	Missing value	4	4	52	M	UCLP	NA	Normal	NA	Excl	Excl	Table 2
Hanchanlert et al., 2015	Motor-phonetic	Speech assistant & parent (home)	36	8		10	4	124	F	UCLP	Normal	Normal	No	No	EGood	Table 2
Hanchanlert et al., 2015	Motor-phonetic	Speech assistant & parent (home)	36	9	Second year for child 6	7	7	91	M	BCLP	Mild	Normal	Yes	Excl	Excl	Table 2	Personal communication about patient returning to treatment.
Hanchanlert et al., 2015	Motor-phonetic	Speech assistant & parent (home)	36	10	Third year for child 6	5	2	62	M	BCLP	Mild	Mild	No	Excl	Excl	Table 2	Personal communication about patient returning to treatment.
Hanchanlert et al., 2015	Motor-phonetic	Speech assistant & parent (home)	36	11	Second year for child 7	5	4	64	M	UCLP	Normal	Normal	No	Excl	Excl	Table 2	Personal communication about patient returning to treatment.
Luyten et al., 2016	Motor-phonetic	SLP (clinic)	0.428571	1		10.7		128.4	F	UCLP	Mild	Normal	Yes	Yes	Good	Table 3
Luyten et al., 2016	Motor-phonetic	SLP (clinic)	0.428571	2		17.6		211.2	F	CP	Moderate	Moderate	No	No	No	Table 3
Luyten et al., 2016	Motor-phonetic	SLP (clinic)	0.428571	3		15.2		182.4	M	CP	Severe	Severe	No	No	No	Table 3
Luyten et al., 2016	Motor-phonetic	SLP (clinic)	0.428571	4		19.6		235.2	F	UCLP	Severe	Severe	No	No	No	Table 3
Luyten et al., 2016	Motor-phonetic	SLP (clinic)	0.428571	5		7.3		87.6	F	UCLP	Mild	Normal	Yes	Yes	Good	Table 3
Prathanee et al., 2020	Motor-phonetic	Speech assistant & parent (home)	48	L002		4.8		57.6	F	UCLP	Normal	Normal	No	No	EGood	Table 2
Prathanee et al., 2020	Motor-phonetic	Speech assistant & parent (home)	48	L003		5.3		63.6	M	UCLP	Normal	Occasionally	Negative	No	No	Table 2
Prathanee et al., 2020	Motor-phonetic	Speech assistant & parent (home)	48	L004		3.6		43.2	F	BCLP	Occasionally	Normal	Yes	Yes	Good	Table 2
Prathanee et al., 2020	Motor-phonetic	Speech assistant & parent (home)	48	L007		16		192	M	UCLP	Most	Often	Yes	No	No	Table 2
Prathanee et al., 2020	Motor-phonetic	Speech assistant & parent (home)	48	L009		6.1		73.2	F	UCLP	Occasionally	Occasionally	No	No	No	Table 2
Prathanee et al., 2020	Motor-phonetic	Speech assistant & parent (home)	48	L012		3.7		44.4	F	UCLP	Normal	Normal	No	No	EGood	Table 2
Prathanee et al., 2020	Motor-phonetic	Speech assistant & parent (home)	48	L013		3.6		43.2	M	UCLP	Normal	Normal	No	No	EGood	Table 2
Prathanee et al., 2020	Motor-phonetic	Speech assistant & parent (home)	48	L014		15.3		183.6	F	BCLP	Occasionally	Normal	Yes	Yes	Good	Table 2
Prathanee et al., 2020	Motor-phonetic	Speech assistant & parent (home)	48	L015		7.4		88.8	M	UCLP	Often	Often	No	No	No	Table 2
Prathanee et al., 2020	Motor-phonetic	Speech assistant & parent (home)	48	L016		4.1		49.2	M	BCLP	Often	Most	Negative	No	No	Table 2
Prathanee et al., 2020	Motor-phonetic	Speech assistant & parent (home)	48	L020	Missing value	4.1		49.2	F	UCLP	Most	NA		Excl	Excl	Table 2
Prathanee et al., 2020	Motor-phonetic	Speech assistant & parent (home)	48	L024		9.1		109.2	M	CP	Often	Normal	Yes	Yes	Good	Table 2
Prins & Bloomer, 1965	Motor-phonetic	SLP (clinic)	8	1		11-16					9.83	4.26	5.57	Yes	Not	Table 1	Eight weeks of therapy, once per day - so maybe 40 hours.
Prins & Bloomer, 1965	Motor-phonetic	SLP (clinic)	8	2		11-16					24	15.13	8.87	Yes	Not	Table 1	Unclear cleft type.
Prins & Bloomer, 1965	Motor-phonetic	SLP (clinic)	8	3		11-16					29.81	10	19.81	Yes	Not	Table 1
Prins & Bloomer, 1965	Motor-phonetic	SLP (clinic)	8	4		11-16					5.69	2.31	3.38	No	No	Table 1
Prins & Bloomer, 1965	Motor-phonetic	SLP (clinic)	8	5		11-16					22.38	7.31	15.07	Yes	Not	Table 1
Prins & Bloomer, 1965	Motor-phonetic	SLP (clinic)	8	6		11-16					13.62	7.23	6.39	Yes	Not	Table 1
Prins & Bloomer, 1965	Motor-phonetic	SLP (clinic)	8	7		11-16					6.08	7.46	-1.38	No	No	Table 1
Prins & Bloomer, 1965	Motor-phonetic	SLP (clinic)	8	8		11-16					30.62	23.77	6.85	No	No	Table 1
Prins & Bloomer, 1965	Motor-phonetic	SLP (clinic)	8	9		11-16					12	15.69	-3.69	No	No	Table 1
Prins & Bloomer, 1965	Motor-phonetic	SLP (clinic)	8	10		11-16					13.92	10.23	3.69	No	No	Table 1
Pumnum et al., 2015	Motor-phonetic	Speech assistant & parent (home)	36	1	Missing value	7	7	91	M	CP	NA	Normal	NA	Excl	Excl	Table 2
Pumnum et al., 2015	Motor-phonetic	Speech assistant & parent (home)	36	2	Missing value	7	8	92	F	UCLP	NA	Mild	NA	Excl	Excl	Table 2
Pumnum et al., 2015	Motor-phonetic	Speech assistant & parent (home)	36	3	No speech deviation	8	1	97	M	CP	Normal	Normal	No	Excl	Excl	Table 2
Pumnum et al., 2015	Motor-phonetic	Speech assistant & parent (home)	36	4	No speech deviation	8	7	103	M	CP	Normal	Normal	No	Excl	Excl	Table 2
Pumnum et al., 2015	Motor-phonetic	Speech assistant & parent (home)	36	5		8	8	104	F	UCLP	Mild	Mild	No	No	No	Table 2
Pumnum et al., 2015	Motor-phonetic	Speech assistant & parent (home)	36	6		5	8	68	F	CP	Mild	Mild	No	No	No	Table 2
Sritacha et al., 2016	Motor-phonetic	Speech assistant & parent (home)	36	1C01	Missing value	5	1	61	F	UCLP	NA	Normal	NA	Excl	Excl	Table 3
Sritacha et al., 2016	Motor-phonetic	Speech assistant & parent (home)	36	1C02	Missing value	4	6	54	F	CP	NA	Normal	NA	Excl	Excl	Table 3
Sritacha et al., 2016	Motor-phonetic	Speech assistant & parent (home)	36	1C03	Missing value	4	1	49	F	UCLP	NA	Normal	NA	Excl	Excl	Table 3
Sritacha et al., 2016	Motor-phonetic	Speech assistant & parent (home)	36	1C05	Missing value	5	3	63	M	UCLP	NA	Mild	NA	Excl	Excl	Table 3
Sritacha et al., 2016	Motor-phonetic	Speech assistant & parent (home)	36	2C01	No speech deviation	6	2	74	F	UCLP	Normal	Normal	No	Excl	Excl	Table 3
Sritacha et al., 2016	Motor-phonetic	Speech assistant & parent (home)	36	3C21		5	3	63	M	UCLP	Moderate	Normal	Yes	Yes	Good	Table 3
Sritacha et al., 2016	Motor-phonetic	Speech assistant & parent (home)	36	3C30		6	0	72	M	CP	Normal	Normal	No	No	EGood	Table 3

## Sheet: Participation
Study	TherapyType	Delivery	Duration	Patient	Exclusion	Year	Y:Month	Months	Gender	Cleft	Pre	Post	Difference	RelevantC	EndPoint	Source	Note
